# Supplementary material
Source: MDPI journal article supplement (https://www.mdpi.com/2076-3417/12/23/12005)
Supplement: s1 [file s1]

*Article*

# **False positive identification of pesticides in food using the European standard method and LC-MS/MS determination: examples and solutions from routine applications**

**Edgár Tóth <sup>1</sup>, Mária Bálint<sup>1</sup> and Ádám Tölgyesi <sup>2,\*</sup>**

<sup>1</sup> Bálint Analitika Ltd., Fehérvári út 144, 1116 Budapest, Hungary

<sup>2</sup> Mertcontrol Hungary Kft., Szabadság út 13, 2144 Kerepes, Hungary

\* Correspondence: tolgyesi83@gmail.com; Tel.: +36 30 7979780

**Supplementary Table S1:** Screening detection Limits (SDLs) established for 415 pesticides in olive oil under screening analysis.

| Number | Compound                  | SDL (ng/g) | Number | Compound               | SDL (ng/g) | Number | Compound                 | SDL (ng/g) |
|--------|---------------------------|------------|--------|------------------------|------------|--------|--------------------------|------------|
| 1      | Acephate                  | 5          | 38     | Buprofezin             | 5          | 75     | Cyanazine                | 5          |
| 2      | Acetamiprid               | 5          | 39     | Butachlor              | 20         | 76     | Cyanofenphos             | 5          |
| 3      | Acetochlor                | 10         | 40     | Butafenacil            | 5          | 77     | Cyanophos                | 5          |
| 4      | Acibenzolar-S-methyl      | 10         | 41     | Butocarboxim           | 5          | 78     | Cyazofamid               | 5          |
| 5      | Alachlor                  | 20         | 42     | Butocarboxim-sulfoxide | 5          | 79     | Cybutrine                | 5          |
| 6      | Aldicarb                  | 5          | 43     | Butoxycarboxim         | 5          | 80     | Cyflufenamid             | 5          |
| 7      | Aldicarb-sulfone          | 5          | 44     | Buturon                | 5          | 81     | Cymiazole                | 5          |
| 8      | Aldicarb-sulfoxide        | 5          | 45     | Cadusafos              | 50         | 82     | Cymoxanil                | 5          |
| 9      | Ametoctradin              | 5          | 46     | Carbaryl               | 5          | 83     | Cyproconazole            | 5          |
| 10     | Ametryn                   | 5          | 47     | Carbendazim            | 5          | 84     | Cyprodinil               | 5          |
| 11     | Amidosulfuron             | 5          | 48     | Carbetamide            | 5          | 85     | Cyromazine               | 5          |
| 12     | Aminocarb                 | 5          | 49     | Carbofuran             | 5          | 86     | Demeton-S                | 10         |
| 13     | Amitraz                   | 5          | 50     | Carboxin               | 5          | 87     | Demeton-S-methyl         | 10         |
| 14     | Anilofos                  | 5          | 51     | Carfentrazon           | 5          | 88     | Demeton-S-methylsulphone | 5          |
| 15     | Atrazine                  | 5          | 52     | Carfentrazone-ethyl    | 5          | 89     | Demeton-S-sulfone        | 5          |
| 16     | Atrazine-desethyl         | 5          | 53     | Chlorantranilprole     | 5          | 90     | Demeton-S-sulfoxide      | 5          |
| 17     | Atrazine-desisopropyl     | 5          | 54     | Chlorbromuron          | 5          | 91     | Desmedipham              | 5          |
| 18     | Azaconazole               | 5          | 55     | Chlorbufam             | 50         | 92     | Desmetryn                | 5          |
| 19     | Azamethiphos              | 5          | 56     | Chlorfenvinphos        | 5          | 93     | Diallát                  | 50         |
| 20     | Azinphos-ethyl            | 5          | 57     | Chlorfluazuron         | 10         | 94     | Diazinon                 | 5          |
| 21     | Azinphos-methyl           | 5          | 58     | Chloridazon            | 5          | 95     | Dichlorvos               | 10         |
| 22     | Aziprotryne               | 5          | 59     | Chlorotoluron          | 5          | 96     | Diclobutrazol            | 5          |
| 23     | Azoxystrobin              | 5          | 60     | Chloroxuron            | 5          | 97     | Dicrotophos              | 5          |
| 24     | Benalaxyl                 | 5          | 61     | Chlorpyrifos           | 5          | 98     | Diethofencarb            | 5          |
| 25     | Bendiocarb                | 5          | 62     | Chlorpyrifos-methyl    | 20         | 99     | Difenoconazole           | 5          |
| 26     | Benflutamid               | 5          | 63     | Chlorsulfuron          | 5          | 100    | Difenoxyuron             | 5          |
| 27     | Bensulfuron-metil         | 5          | 64     | Chlorthiophos          | 5          | 101    | Diiflubenzuron           | 5          |
| 28     | Benthiavalicarb-isopropyl | 5          | 65     | Chromafenozide         | 5          | 102    | Diiflufenican            | 5          |
| 29     | Benzolyp-prop-ethyl       | 5          | 66     | Cinosulfuron           | 5          | 103    | Dimefox                  | 5          |
| 30     | Benzoximate               | 5          | 67     | Cirimidine             | 5          | 104    | Dimefuron                | 5          |
| 31     | Benzthiazuron             | 5          | 68     | Clethodim              | 5          | 105    | Dimethachlor             | 5          |
| 32     | Bifenazate                | 5          | 69     | Clofentezine           | 5          | 106    | Dimethenamid             | 5          |
| 33     | Bitertanol                | 5          | 70     | Clomazone              | 5          | 107    | Dimethirimol             | 5          |
| 34     | Boscalid                  | 5          | 71     | Cloquintocet-mexyl     | 5          | 108    | Dimethoate               | 5          |
| 35     | Bromacil                  | 5          | 72     | Clothianidin           | 5          | 109    | Dimethomorph             | 5          |
| 36     | Bromucanazole             | 10         | 73     | Coumaphos              | 5          | 110    | Dimoxystrobin            | 5          |
| 37     | Bupirimate                | 5          | 74     | Crufomat               | 5          | 111    | Diniconazole             | 10         |

| Number | Compound               | SDL<br>(ng/g) | Number | Compound                   | SDL<br>(ng/g) | Number | Compound                | SDL<br>(ng/g) |
|--------|------------------------|---------------|--------|----------------------------|---------------|--------|-------------------------|---------------|
| 112    | Dinotefuran            | 5             | 149    | Fenhexamid                 | 5             | 186    | Flutolanil              | 5             |
| 113    | Dioxacarb              | 5             | 150    | Fenitrothion               | 50            | 187    | Flutriafol              | 5             |
| 114    | Diphenamid             | 5             | 151    | Fenobucarb                 | 5             | 188    | Fluxapyroxad            | 5             |
| 115    | Dipropetryn            | 5             | 152    | Fenoxaprop-P-ethyl         | 5             | 189    | Fomesafen               | 25            |
| 116    | Disulfoton             | 50            | 153    | Fenoxycarb                 | 5             | 190    | Fonofos                 | 10            |
| 117    | Disulfoton-sulfone     | 25            | 154    | Fenpropimorph              | 5             | 191    | Foramsulfuron           | 5             |
| 118    | Disulfoton-sulfoxide   | 25            | 155    | Fenpyroximate              | 5             | 192    | Forchlorfenuron         | 5             |
| 119    | Diuron                 | 5             | 156    | Fensulfothion              | 5             | 193    | Formetanate HCl         | 5             |
| 120    | DMST                   | 10            | 157    | Fensulfothion-oxon         | 5             | 194    | Fosthiazat              | 5             |
| 121    | Dodemorph              | 5             | 158    | Fensulfothion-oxon-sulfone | 5             | 195    | Fuberidazole            | 5             |
| 122    | Dodine                 | 10            | 159    | Fensulfothion-sulfone      | 5             | 196    | Furalaxyl               | 5             |
| 123    | Doramectin             | 10            | 160    | Fenthion                   | 10            | 197    | Furathiocarb            | 5             |
| 124    | Emamectin-benzoate b1a | 5             | 161    | Fenthion-oxon-sulfone      | 5             | 198    | Halofenozide            | 5             |
| 125    | Emamectin-benzoate b1b | 25            | 162    | Fenthion-oxon-sulfoxide    | 5             | 199    | Haloxifop               | 10            |
| 126    | Epoxiconazole          | 5             | 163    | Fenthion-sulfone           | 5             | 200    | Haloxifop-2-ethoxyethyl | 5             |
| 127    | Etaconazole            | 5             | 164    | Fenthion-sulfoxid          | 5             | 201    | Haloxifop-P-methyl      | 5             |
| 128    | Ethidimuron            | 5             | 165    | Fenuron                    | 5             | 202    | Heptenophos             | 5             |
| 129    | Ethiofencarb           | 5             | 166    | Fipronil                   | 25            | 203    | Hexaconazole            | 5             |
| 130    | Ethiofencarb-sulfone   | 5             | 167    | Flamprop-isopropyl         | 5             | 204    | Hexaflumuron            | 25            |
| 131    | Ethiofencarb-sulfoxide | 5             | 168    | Flamprop-methyl            | 5             | 205    | Hexazonon(Velpar)       | 5             |
| 132    | Ethion                 | 5             | 169    | Flazasulfuron              | 5             | 206    | Hexythiazox             | 5             |
| 133    | Ethiprole              | 5             | 170    | Flonicamid                 | 5             | 207    | Hydramethylnon          | 5             |
| 134    | Ethirimol              | 5             | 171    | Florasulam                 | 5             | 208    | Hydroxycarbofuran       | 5             |
| 135    | Ethofumesate           | 5             | 172    | Fluazifop                  | 5             | 209    | Imazalil                | 5             |
| 136    | Ethoprophos            | 5             | 173    | Fluazuron                  | 5             | 210    | Imazaquin               | 5             |
| 137    | Ethoxyquin             | 5             | 174    | Flubendiamide              | 5             | 211    | Imidacloprid            | 5             |
| 138    | Etoazole               | 5             | 175    | Fludioxinil                | 25            | 212    | Indoxacarb              | 5             |
| 139    | Etrimfos               | 5             | 176    | Flufenacet                 | 5             | 213    | Ipconazole              | 5             |
| 140    | Famoxadone             | 25            | 177    | Flufenoxuron               | 5             | 214    | Iprobenfos              | 5             |
| 141    | Fenamidone             | 5             | 178    | Fluometuron                | 5             | 215    | Iprodione               | 50            |
| 142    | Fenamiphos             | 5             | 179    | Fluopicolide               | 5             | 216    | Iprovalicarb            | 5             |
| 143    | Fenamiphos-sulfone     | 5             | 180    | Fluopyram                  | 5             | 217    | Isocarbamide            | 5             |
| 144    | Fenamiphos-sulfoxide   | 5             | 181    | Fluoxastrobin              | 5             | 218    | Isofenphos              | 5             |
| 145    | Fenarimol              | 10            | 182    | Fluquinconazole            | 5             | 219    | Isofenphos-methyl       | 25            |
| 146    | Fenazaquin             | 5             | 183    | Fluridone                  | 5             | 220    | Isoprocab               | 5             |
| 147    | Fenbuconazole          | 5             | 184    | Flusilazole                | 5             | 221    | Isoprothiolane          | 5             |
| 148    | Fenfuram               | 5             | 185    | Fluthiacet-methyl          | 5             | 222    | Isoproturon             | 5             |

| Number | Compound           | SDL<br>(ng/g) | Number | Compound          | SDL<br>(ng/g) | Number | Compound                      | SDL<br>(ng/g) |
|--------|--------------------|---------------|--------|-------------------|---------------|--------|-------------------------------|---------------|
| 223    | Isoxaflutole       | 5             | 262    | Mevinphos         | 5             | 301    | Phoxim                        | 5             |
| 224    | Isoxathion         | 5             | 263    | Mexacarbate       | 5             | 302    | Picoxystrobin                 | 5             |
| 225    | Ivermectin         | 10            | 264    | Molinate          | 10            | 303    | Pinoxaden                     | 5             |
| 226    | izoxaben           | 5             | 265    | Monocrotophos     | 5             | 304    | Piperonyl-butoxide            | 5             |
| 227    | Kresoxim-methyl    | 20            | 266    | Monolinuron       | 5             | 305    | Piperophos                    | 5             |
| 228    | Linuron            | 5             | 267    | Monuron           | 5             | 306    | Pirimicarb                    | 5             |
| 229    | Lufenuron          | 20            | 268    | Moxidectin        | 10            | 307    | Pirimicarb-desmethyl          | 5             |
| 230    | Malaoxon           | 5             | 269    | Myclobutanil      | 5             | 308    | Pirimiphos-ethyl              | 5             |
| 231    | Malathion          | 5             | 270    | Napropamide       | 5             | 309    | Pirimiphos-methyl             | 5             |
| 232    | Mandipropamid      | 5             | 271    | Neburon           | 5             | 310    | Pirimisulfuron-metil          | 5             |
| 233    | Mecarbam           | 5             | 272    | Nitenpyram        | 5             | 311    | Prochloraz                    | 5             |
| 234    | Mefenacet          | 5             | 273    | Nitralin          | 10            | 312    | Prochloraz-desimidazole-amino | 5             |
| 235    | Mefenpyr-diethyl   | 10            | 274    | Norflurazon       | 5             | 313    | Profluralin                   | 20            |
| 236    | Mepanipyrim        | 5             | 275    | Nuarimol          | 10            | 314    | Promecarb                     | 5             |
| 237    | Mephosfolan        | 5             | 276    | Omethoate         | 5             | 315    | Prometon                      | 5             |
| 238    | Mepronil           | 5             | 277    | Oxadiazon         | 10            | 316    | Prometryne                    | 5             |
| 239    | Mesotrione         | 5             | 278    | Oxadixyl          | 5             | 317    | Propachlor                    | 5             |
| 240    | Metaflumizone      | 5             | 279    | Oxamyl            | 5             | 318    | Propamocarb                   | 5             |
| 241    | Metalaxyl          | 5             | 280    | Oxamyl-oxime      | 5             | 319    | Propanil                      | 5             |
| 242    | Metamitron         | 5             | 281    | Oxycarboxin       | 10            | 320    | Propargite                    | 5             |
| 243    | Metazachlor        | 5             | 282    | Oxydemeton-methyl | 5             | 321    | Propetamphos                  | 5             |
| 244    | Metconazole        | 5             | 283    | Paclobutrazol     | 5             | 322    | Propham                       | 50            |
| 245    | Methabenzthiazuron | 5             | 284    | Paraoxon          | 5             | 323    | Propiconazole1                | 5             |
| 246    | Methacrifos        | 20            | 285    | Paraoxon-ethyl    | 5             | 324    | Propoxur                      | 5             |
| 247    | Methamidophos      | 5             | 286    | Paraoxon-methyl   | 5             | 325    | Propyzamide                   | 5             |
| 248    | Methidathion       | 5             | 287    | Penconazole       | 5             | 326    | Proquinazid                   | 5             |
| 249    | Methiocarb         | 5             | 288    | Pencycuron        | 5             | 327    | Prosulfocarb                  | 5             |
| 250    | Methiocarb-sulfone | 5             | 289    | Pendimethalin     | 20            | 328    | Prosulfuron                   | 5             |
| 251    | Methomyl           | 10            | 290    | Penthiopyrad      | 5             | 329    | Prothioconazole               | 50            |
| 252    | Methoprotryne      | 5             | 291    | Pethoxamid        | 5             | 330    | Prothiofos                    | 20            |
| 253    | Methoxyfenozide    | 5             | 292    | Phenmedipham      | 5             | 331    | Pymetrozine                   | 5             |
| 254    | Metobromuron       | 5             | 293    | Phenothrin        | 20            | 332    | Pyracarbolid                  | 5             |
| 255    | Metolachlor        | 5             | 294    | Phenthoate        | 5             | 333    | Pyraclostrobin                | 5             |
| 256    | Metolcarb          | 10            | 295    | Phenylthiourea    | 5             | 334    | Pyraflufen-ethyl              | 5             |
| 257    | Metosulam          | 5             | 296    | Phorate-sulfone   | 5             | 335    | Pyrazophos                    | 5             |
| 258    | Metoxuron          | 5             | 297    | Phorate-sulfoxide | 5             | 336    | Pyrethrin                     | 10            |
| 259    | Metrafenon         | 10            | 298    | Phosalone         | 5             | 337    | Pyridaben                     | 5             |
| 260    | Metribuzin         | 5             | 299    | Phosmet           | 5             | 338    | Pyridafol                     | 5             |

|     |                    |   |     |              |   |     |                 |   |
|-----|--------------------|---|-----|--------------|---|-----|-----------------|---|
| 261 | Metsulfuron-methyl | 5 | 300 | Phosphamidon | 5 | 339 | Pyridaphenthion | 5 |
|-----|--------------------|---|-----|--------------|---|-----|-----------------|---|

| Number | Compound              | SDL<br>(ng/g) | Number | Compound                                    | SDL<br>(ng/g) | Number | Compound                        | SDL<br>(ng/g) |
|--------|-----------------------|---------------|--------|---------------------------------------------|---------------|--------|---------------------------------|---------------|
| 340    | Pyrifenoxy            | 5             | 366    | Sulfosulfuron                               | 5             | 392    | Thiofanox-sulfoxide             | 20            |
| 341    | Pyrimethanil          | 5             | 367    | Sulfotep<br>(Tetraethyldithiopyrophosphate) | 20            | 393    | Thionazin(zinophos)             | 50            |
| 342    | Pyriproxyfen          | 5             | 368    | Tau-fluvalinate                             | 5             | 394    | Thiophanate                     | 5             |
| 343    | Pyroquilon            | 5             | 369    | Tebuconazole                                | 5             | 395    | Thiophanate-methyl              | 5             |
| 344    | Quinalphos            | 5             | 370    | Tebufenozide                                | 5             | 396    | Tolclofos-methyl                | 20            |
| 345    | Quinoclamine          | 5             | 371    | Tebufenpyrad                                | 5             | 397    | Tolfenpyrad                     | 5             |
| 346    | Quinoxifen            | 5             | 372    | Tebutam                                     | 5             | 398    | Tralkoxydim                     | 5             |
| 347    | Quizalofop            | 10            | 373    | Tebuthiuron                                 | 5             | 399    | Triadimefon                     | 5             |
| 348    | Resmethrin            | 10            | 374    | Teflubenzuron                               | 50            | 400    | Triadimenol                     | 10            |
| 349    | Rimsulfuron           | 10            | 375    | Tembotrion                                  | 5             | 401    | Triallate                       | 50            |
| 350    | Rotenone              | 5             | 376    | Temephos                                    | 5             | 402    | Triasulfuron                    | 5             |
| 351    | Sebuthylazin          | 5             | 377    | Terbufos-sulfone                            | 5             | 403    | Triazophos                      | 5             |
| 352    | Secbumeton            | 5             | 378    | Terbufos-sulfoxide                          | 5             | 404    | Trichlorfon                     | 5             |
| 353    | Silthiofam            | 5             | 379    | Terbumeton                                  | 5             | 405    | Tricyclazole                    | 5             |
| 354    | Simazine              | 5             | 380    | Terbuthylazine-desethyl                     | 5             | 406    | Trietazin                       | 5             |
| 355    | Simetryn              | 5             | 381    | Terbutryn                                   | 5             | 407    | Trifloxystrobin                 | 5             |
| 356    | Spinetoram            | 5             | 382    | Tetrachlorvinphos                           | 5             | 408    | Triflumizole                    | 5             |
| 357    | Spinosad (Spinosyn A) | 5             | 383    | Tetraconazole                               | 5             | 409    | Triflumuron                     | 5             |
| 358    | Spinosad (Spinosyn D) | 5             | 384    | Tetrametrin                                 | 20            | 410    | Triflusulfuron-methyl           | 5             |
| 359    | Spirodiclofen         | 10            | 385    | Thiabendazole                               | 5             | 411    | Trimethylphenyl-methylcarbamate | 5             |
| 360    | Spiromesifen          | 10            | 386    | Thiacloprid                                 | 5             | 412    | Triticonazole                   | 5             |
| 361    | Spirotetramat         | 5             | 387    | Thiamethoxam                                | 5             | 413    | Vamidothion                     | 5             |
| 362    | Spirotetramat-cisenol | 20            | 388    | Thidiazuron                                 | 5             | 414    | Vamidothion-sulfoxide           | 5             |
| 363    | Spiroxamine           | 5             | 389    | Thifensulfuron-methyl                       | 5             | 415    | Zoxamide                        | 5             |
| 364    | Sulfentrazone         | 5             | 390    | Thiodicarb                                  | 5             |        |                                 |               |
| 365    | Sulfometuron-methyl   | 5             | 391    | Thiofanox-sulfone                           | 5             |        |                                 |               |

**Supplementary Table S2:** Recovery% (n = 10) and precision (RSD%) data calculated for 23 compounds under confirmatory validation. Sample matrix was olive oil. The first and second data correspond to 0.010 mg/kg and 0.100 mg/kg spiking levels, respectively.

| Compound                    | Recovery% | RSD%     |
|-----------------------------|-----------|----------|
| Atrazin                     | 103-106   | 3.8-5.4  |
| Benalaxyl                   | 98.1-103  | 3.6-5.2  |
| Bromacil                    | 101-104   | 1.5-3.0  |
| Carbofuran                  | 98.9-103  | 1.0-8.4  |
| Chlorotoluron               | 99.2-104  | 3.1-7.1  |
| Cyprodinil                  | 104-113   | 7.8-8.4  |
| Dimethomorph Isomer 1       | 98.9-103  | 2.0-6.1  |
| Dimethomorph Isomer 2       | 98.8-101  | 1.9-10.5 |
| Sum of dimethomorph isomers | 98.8-102  | 1.7-7.8  |
| Famoxadone                  | 101-103   | 2.4-9.8  |
| Fenamidone                  | 98.7-105  | 1.6-7.5  |
| Fludioxinil                 | 92.8-103  | 3.7-3.8  |
| Imazaquin                   | 96.4-107  | 4.4-5.2  |
| Iprovalicarb                | 99.6-106  | 1.4-5.2  |
| Mepanipyrim                 | 95.7-102  | 6.0-6.1  |
| Metazachlor                 | 93.9-100  | 1.1-9.6  |
| Metsulfuron-methyl          | 92.0-103  | 1.7-10.2 |
| Monocrotophos               | 96.4-102  | 2.4-7.9  |
| Oxadiazon                   | 94.0-103  | 6.6-9.2  |
| Pendimethalin               | 89.1-99.6 | 2.7-6.6  |
| Pyraclostrobin              | 102-105   | 4.4-6.3  |
| Spiroxamine                 | 96.5-103  | 4.7-13.3 |
| Thiamethoxam                | 96.7-99.6 | 1.2-11.4 |
| Tralkoxydim                 | 104-107   | 6.8-6.9  |
